# Supplementary material for: Syk Kinase Inhibitors Synergize with Artemisinins by Enhancing Oxidative Stress in Plasmodium falciparum-Parasitized Erythrocytes
Source: Antioxidants (Basel). 2020 Aug 14;9(8):753. doi: 10.3390/antiox9080753 (PMC7464437; doi:10.3390/antiox9080753)
Supplement: Supplementary file 1 [file antioxidants-09-00753-s001.pdf]

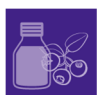

## Supplementary materials

## Effect of Syk inhibitors and DHA on HMC content

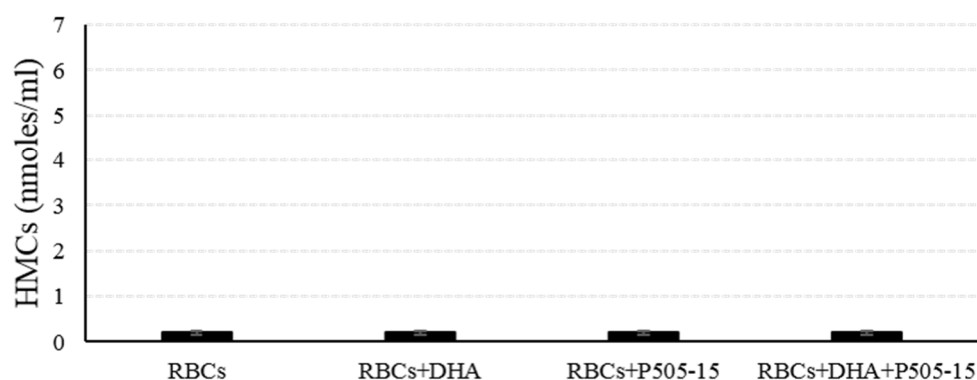

**Figure S1.** Effect of RBCs treatment with P505-15 (0.5  $\mu$ M) and DHA (0.5 nM) on the accumulation of HMC after 12 h of incubation. Data are the average of 5 experiments  $\pm$  S.D.

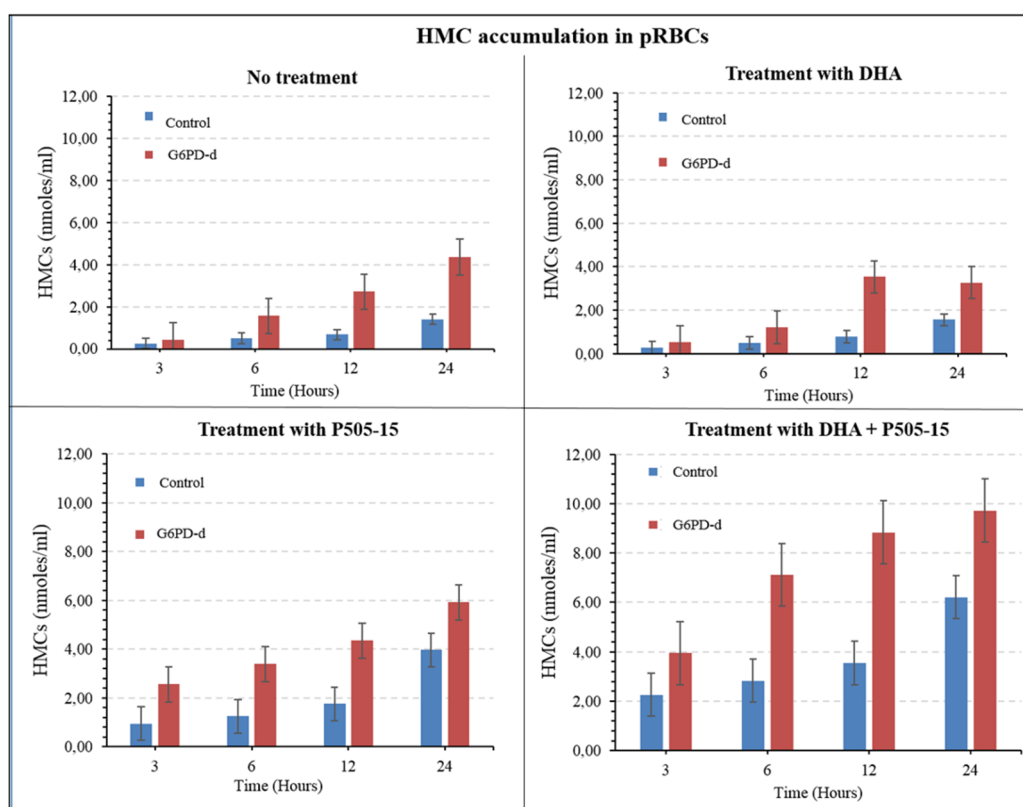

**Figure S2.**

Effect of pRBC treatments with a representative Syk inhibitor (P505-15) (0.5  $\mu$ M) and DHA (0.5 nM) on the accumulation of HMC after 3, 6, 12 and 24 h in control and G6PD-d treated RBCs. Data are the average of 5 experiments  $\pm$  S.D. Significant differences to untreated pRBCs at \* $p < 0.05$ ; \*\* $p < 0.001$ .

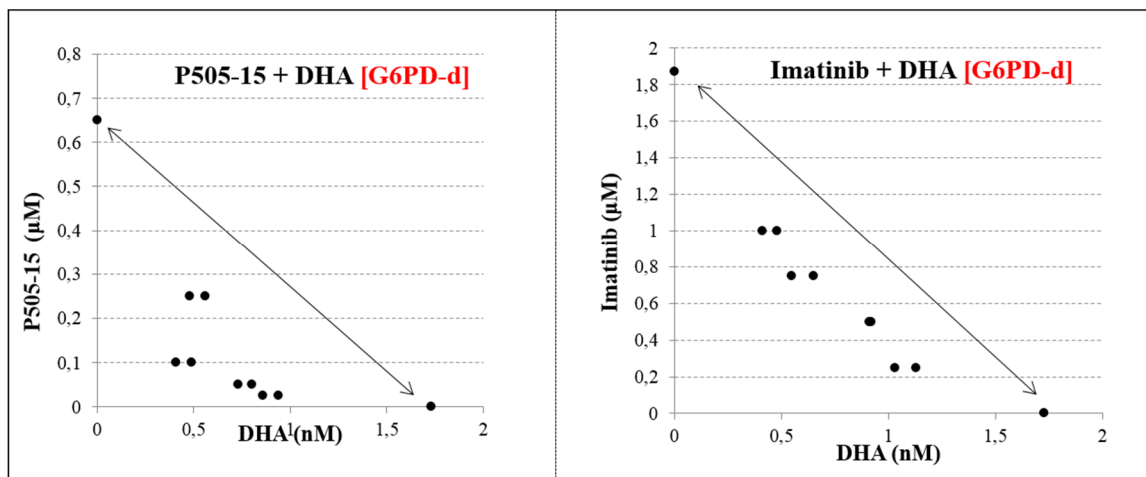

**Figure S3.** Isobolograms showing the interactions between Syk Inhibitors (P505-15 and Imatinib) with dihydroartemisinin (DHA), after 24 h of incubation in the *P. falciparum* Palo Alto strain treated with G6PD-d red cells.

**Table 1.** Combination index (CI) (Chow-Talalay) of different SYK inhibitors.

|                                                   | Artesunate       |                  | Artemether       |                  |
|---------------------------------------------------|------------------|------------------|------------------|------------------|
|                                                   | 24h              | 48h              | 24h              | 48h              |
| <b>P505-15</b><br>(IC <sub>50</sub> = 1 nM)       | 0.97±0.03        | 0.55±0.07        | <b>0.87±0.03</b> | 0.83±0.01        |
|                                                   | 0.76±0.08        | 0.51±0.01        | 0.89±0.01        | 0.65±0.03        |
|                                                   | 0.63±0.03        | 0.61±0.03        | 0.95±0.01        | 0.63±0.04        |
|                                                   | <b>0.58±0.07</b> | <b>0.49±0.05</b> | 0.98±0.04        | <b>0.58±0.01</b> |
| <b>Entospletinib</b><br>(IC <sub>50</sub> = 1 nM) | 0.87±0.03        | 0.74±0.04        | 1.01±0.03        | 0.83±0.04        |
|                                                   | 0.73±0.02        | 0.62±0.01        | <b>0.95±0.05</b> | 0.68±0.04        |
|                                                   | 0.66±0.01        | 0.60±0.02        | 0.98±0.03        | <b>0.63±0.03</b> |
|                                                   | <b>0.62±0.02</b> | <b>0.55±0.02</b> | 1.04±0.07        | 0.72±0.04        |
| <b>R406</b><br>(IC <sub>50</sub> = 41 nM)         | 0.82±0.04        | 0.75±0.02        | 0.85±0.03        | 0.93±0.04        |
|                                                   | 0.63±0.01        | 0.72±0.01        | 0.82±0.01        | 0.88±0.04        |
|                                                   | <b>0.76±0.03</b> | 0.50±0.02        | <b>0.80±0.04</b> | 0.73±0.03        |
|                                                   | 0.92±0.02        | <b>0.44±0.02</b> | 0.82±0.04        | <b>0.72±0.04</b> |
| <b>SYK II</b><br>(IC <sub>50</sub> = 41 nM)       | 0.79±0.04        | <b>0.89±0.04</b> | <b>0.97±0.01</b> | 0.73±0.02        |
|                                                   | <b>0.55±0.01</b> | 0.99±0.03        | 0.99±0.03        | 0.58±0.04        |
|                                                   | 0.67±0.04        | 0.96±0.01        | 1.06±0.05        | <b>0.53±0.05</b> |
|                                                   | 0.89±0.02        | 0.90±0.04        | 1.12±0.01        | 0.62±0.07        |
| <b>Imatinib</b><br>(IC <sub>50</sub> = 5 µM)      | 0.67±0.03        | 0.75±0.02        | 1.01±0.02        | 0.83±0.01        |
|                                                   | <b>0.61±0.04</b> | 0.96±0.04        | 0.89±0.03        | 0.78±0.06        |
|                                                   | 0.70±0.01        | 0.64±0.01        | 0.91±0.01        | <b>0.73±0.04</b> |
|                                                   | 0.90±0.02        | <b>0.60±0.02</b> | <b>0.85±0.02</b> | 0.82±0.04        |
| <b>Piceatannol</b><br>(IC <sub>50</sub> = 10 µM)  | 0.77±0.01        | <b>0.65±0.03</b> | 0.95±0.01        | <b>0.73±0.02</b> |
|                                                   | <b>0.71±0.03</b> | 0.66±0.07        | <b>0.78±0.01</b> | 0.80±0.01        |
|                                                   | 0.80±0.02        | 0.84±0.02        | 0.85±0.02        | 0.83±0.04        |
|                                                   | 0.85±0.01        | 0.90±0.04        | 0.78±0.03        | 0.75±0.01        |

SYK inhibitors (P505-15, R406, entospletinib, SYK II, piceatannol, and imatinib) at different concentrations (50–500 nM) in combination with different artemisinin derivatives (artesunate, and artemether) after 24 and 48 h of incubation. [additive effect (C = 1), synergism (CI < 1), and antagonism (CI > 1)].
